# Supplementary material
Source: HighWire-hosted journal article supplement (https://jnm.snmjournals.org/highwire/filestream/93950/field_highwire_adjunct_files/1/51847_Supplemental_Figure_2.pdf)
Supplement: 51847_Supplemental_Figure_2.pdf [file 51847_Supplemental_Figure_2.pdf]

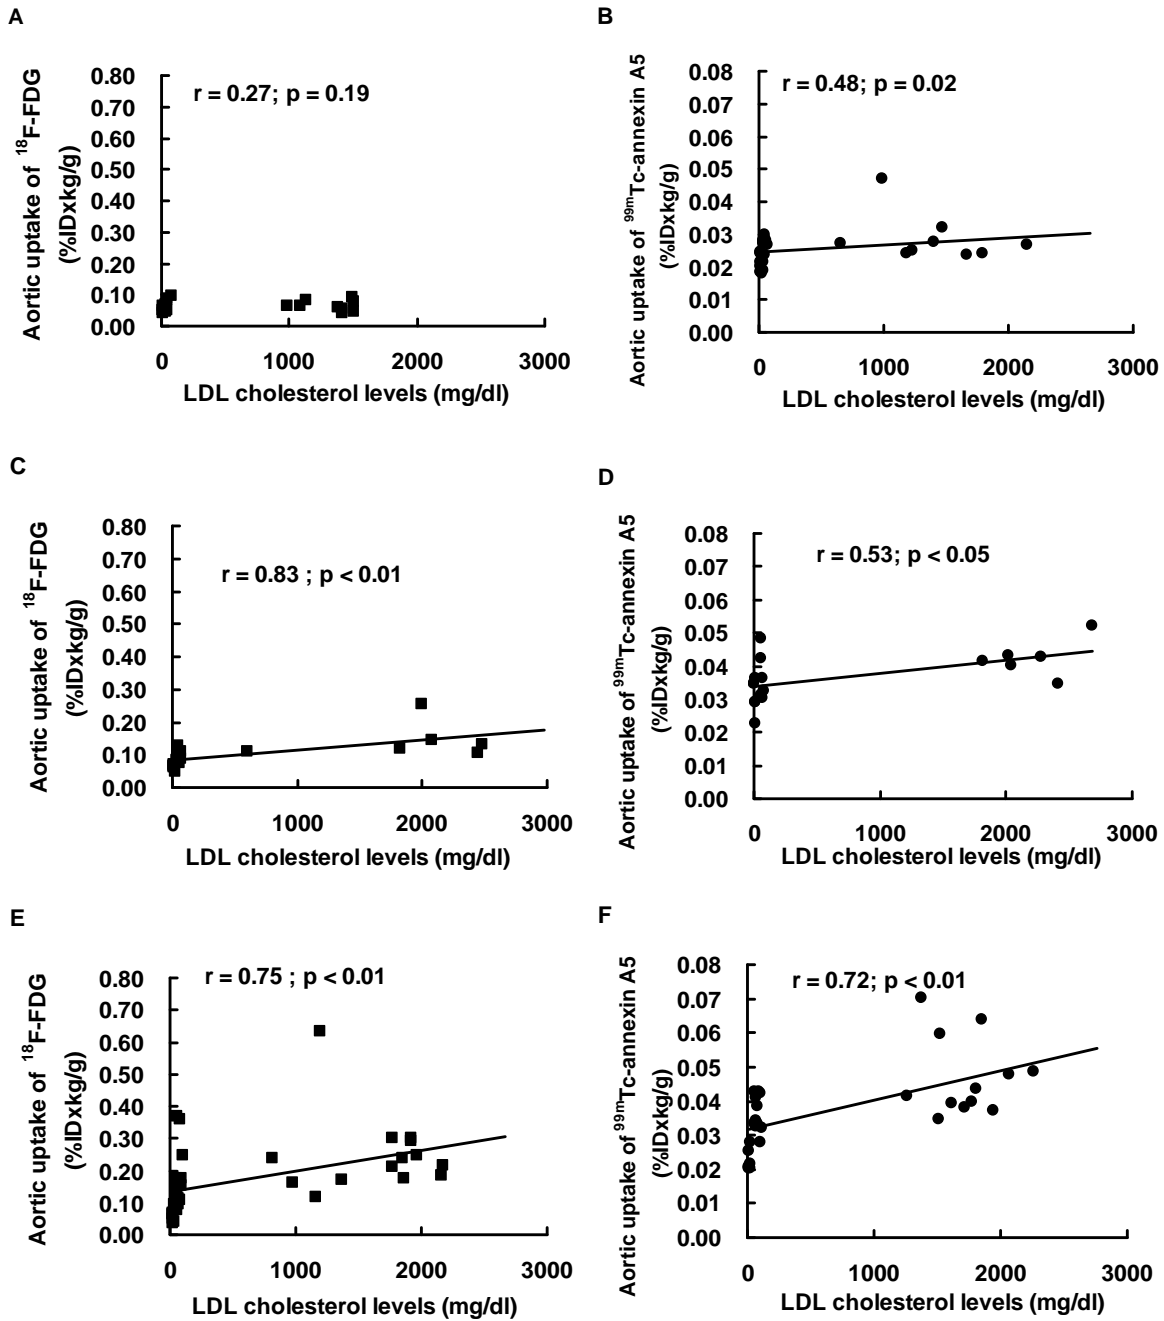

**Supplemental Figure 2.** Correlations between LDL cholesterol levels and aortic tracer uptake were assessed using Spearman's correlation coefficient by rank analysis in  $^{18}\text{F}$ -FDG (A, C, E) and  $^{99\text{m}}\text{Tc}$ -annexin A5 (B, D, F) groups at 10 weeks (A, B), 18 weeks (C, D), and 25 weeks (E, F) old. Positive correlations were observed in both tracer groups at each age, except in  $^{18}\text{F}$ -FDG group at 10 weeks old (A).
